# Supplementary material for: Identification of molecular sub-networks associated with cell survival in a chronically SIVmac-infected human CD4+ T cell line
Source: Virol J. 2014 Aug 27;11:152. doi: 10.1186/1743-422X-11-152 (PMC4163169; doi:10.1186/1743-422X-11-152)
Supplement: Supplementary file 6 — Additional file 6: Table S1: Top upregulated hubs in the chronic SIV infection of C8166 T cells predicted by the ICF. (XLSX 12 KB) [file 12985_2013_2486_MOESM6_ESM.xlsx]

## Sheet: Sheet1
Entrez gene ID	number of known interactions in the database		number of affected interactions	total number of affected ppi in chronic infection	total number of ppi		binomial distribution p-value	expression change fold (log2, chronic vs. ctl)		gene symbol
857	81		40	1095	36487		0	2.268		CAV1
8202	53		31	1095	36487		0	1.098		NCOA3
4137	43		27	1095	36487		0	2.192		MAPT
10657	37		24	1095	36487		0	1.319		KHDRBS1
1050	37		22	1095	36487		0	1.102		CEBPA
8440	35		21	1095	36487		0	1.399		NCK2
960	36		14	1095	36487		2.7522e-13	1.428		CD44
5272	25		13	1095	36487		0	2.325		SERPINB9
7805	21		13	1095	36487		0	2.32		LAPTM5
860	24		13	1095	36487		0	2.002		RUNX2
2066	29		13	1095	36487		2.2904e-13	1.17		ERBB4
919	32		13	1095	36487		2.0031e-12	3.546		CD247
3635	26		12	1095	36487		2.486e-12	1.491		INPP5D
5494	13		10	1095	36487		1.9973e-13	1.151		PPM1A
23645	14		9	1095	36487		3.0795e-11	1.528		PPP1R15A
5792	21		9	1095	36487		1.4831e-09	2.157		PTPRF
2626	15		8	1095	36487		1.355e-09	1.198		GATA4
894	10		7	1095	36487		1.2208e-09	1.59		CCND2
9448	10		7	1095	36487		1.2208e-09	1.287		MAP4K4
1911	10		7	1095	36487		1.2208e-09	1.041		PHC1
