# Supplementary material for: Identification of molecular sub-networks associated with cell survival in a chronically SIVmac-infected human CD4+ T cell line
Source: Virol J. 2014 Aug 27;11:152. doi: 10.1186/1743-422X-11-152 (PMC4163169; doi:10.1186/1743-422X-11-152)
Supplement: Supplementary file 8 — Additional file 8: Table S3: Top ‘hidden’ key regulators in chronically SIV-infected C8166 T cells predicted by the ICF. (XLSX 12 KB) [file 12985_2013_2486_MOESM8_ESM.xlsx]

## Sheet: Sheet1
Entrez Gene ID	number of affected PD	number of known PD by the corresponding regulator	binomial distribution P-value	expression change (LOG2) OR Nonsignificantly changed (NS)	gene symbol
4149	28	928	0.030211	NS	MAX
4609	28	888	0.018325	NS	MYC
1874	22	641	0.015053	NS	E2F4
1386	18	203	3.5613e-07	NS	ATF2
5934	14	467	0.10965	NS	RBL2
1869	9	477	0.6598	NS	E2F1
5430	9	187	0.017164	NS	POLR2A
7157	8	54	2.1071e-05	NS	TP53
1385	4	31	0.0042168	NS	CREB1
5991	3	4	8.8529e-05	1.914	RFX3
2118	2	4	0.0032474	-1.742	ETV4
8462	2	5	0.0050055	NS	KLF11
1958	2	15	0.039364	NS	EGR1
